# Supplementary material for: Ag Nanoparticles Decorated CuO@RF Core-Shell Nanowires for High-Performance Surface-Enhanced Raman Spectroscopy Application
Source: MDPI journal article supplement (doi:10.3390/molecules27238460), 2022-12-02
Supplement: s1 [file s1]

Supplemental Information

# Ag Nanoparticles Decorated CuO@RF Core-Shell Nanowires for High-Performance Surface-Enhanced Raman Spectroscopy Application

Tung-Hao Chang <sup>1,2,3</sup>, Hsin-Wei Di <sup>4</sup>, Yu-Cheng Chang <sup>4,\*</sup>, and Chia-Man Chou <sup>5,6,7,\*</sup>

<sup>1</sup> Department of Radiation Oncology, Changhua Christian Hospital, Changhua, 50006, Taiwan,

<sup>2</sup> Department of Radiological Technology, Yuanpei University, Hsinchu, 30015, Taiwan,

<sup>3</sup> Department of Medical Imaging and Radiological Sciences, Central Taiwan University of Science and Technology, Taichung, 40601, Taiwan,

<sup>4</sup> Department of Materials Science and Engineering, Feng Chia University, Taichung 407102, Taiwan;

<sup>5</sup> Department of Surgery, Taichung Veterans General Hospital, Taichung, 40705, Taiwan;

<sup>6</sup> College of Medicine, National Yang Ming Chiao Tung University, Taipei, 11221, Taiwan;

<sup>7</sup> Department of Post-Baccalaureate Medicine, National Chung Hsing University, Taichung, 40227, Taiwan

\* Correspondence: [yuchchang@fcu.edu.tw](mailto:yuchchang@fcu.edu.tw), [cmchou@vghtc.gov.tw](mailto:cmchou@vghtc.gov.tw)

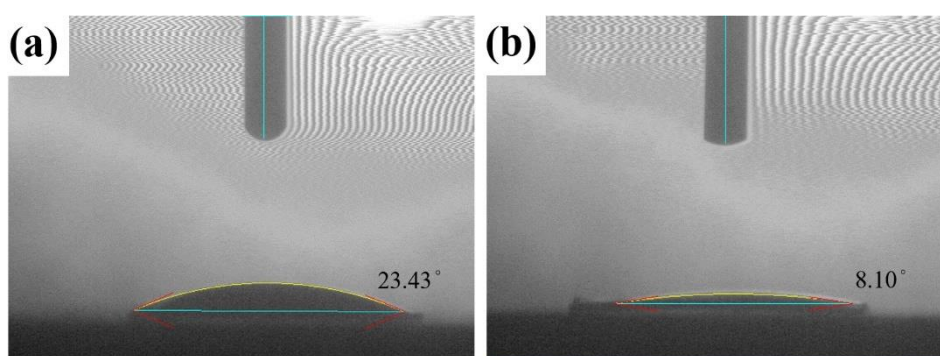

**Figure S1** Contact angle images for water droplets on the surface of (a) CuO nanowires and (b) CuO nanowires with APTMS layer.

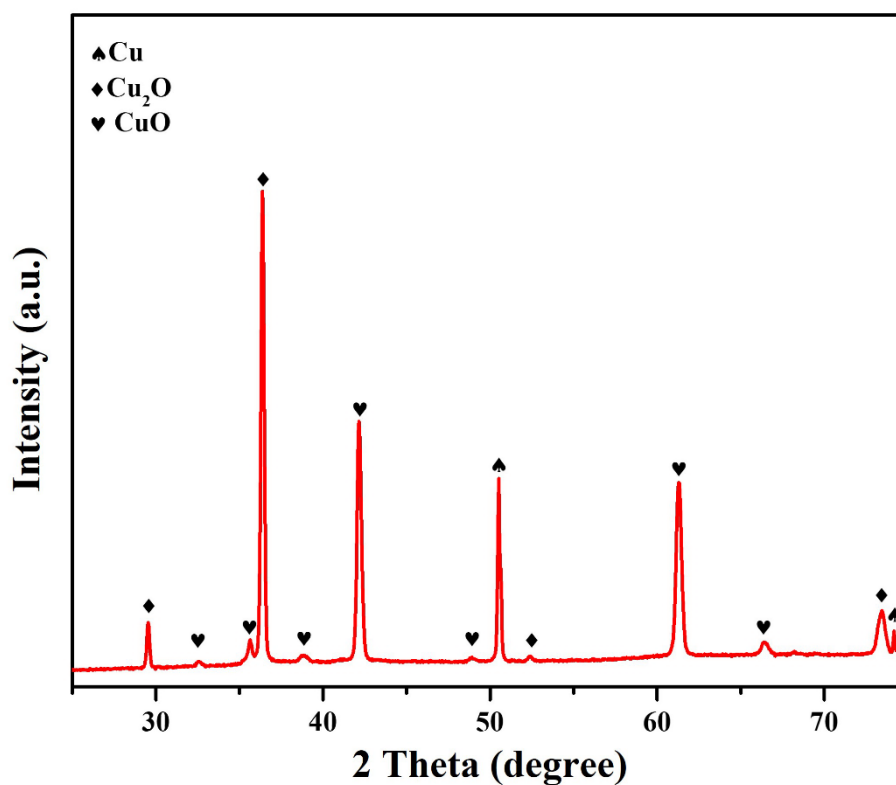

**Figure S2** XRD diffraction pattern of CuO@RF@Ag nanowires grown at the resorcinol weight of 16.37 mg and AgNO<sub>3</sub> concentration of 0.45 mM.

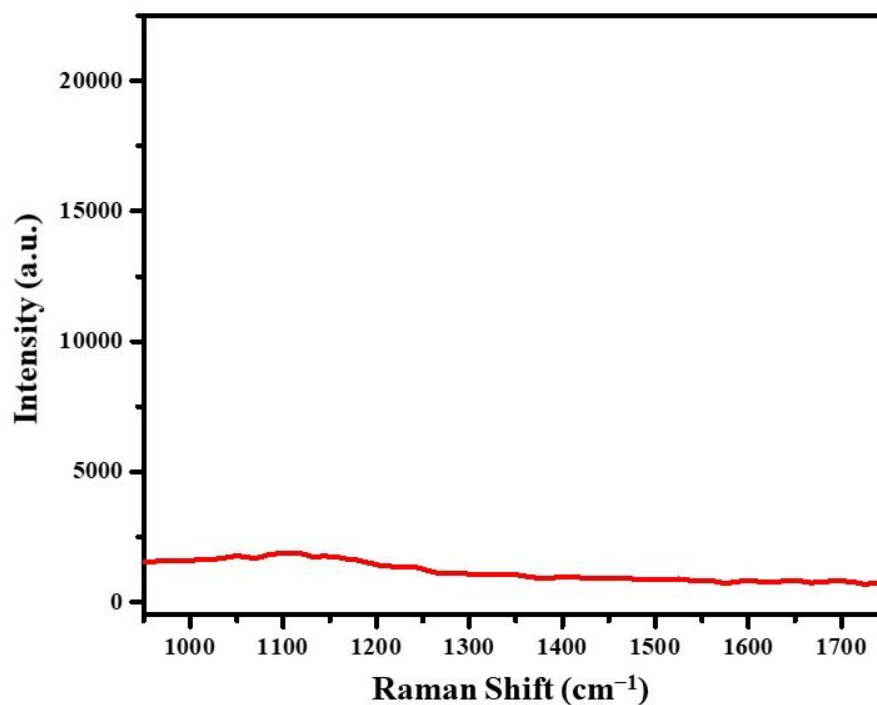

**Figure S3** The Raman spectrum of CuO@RF nanowires.

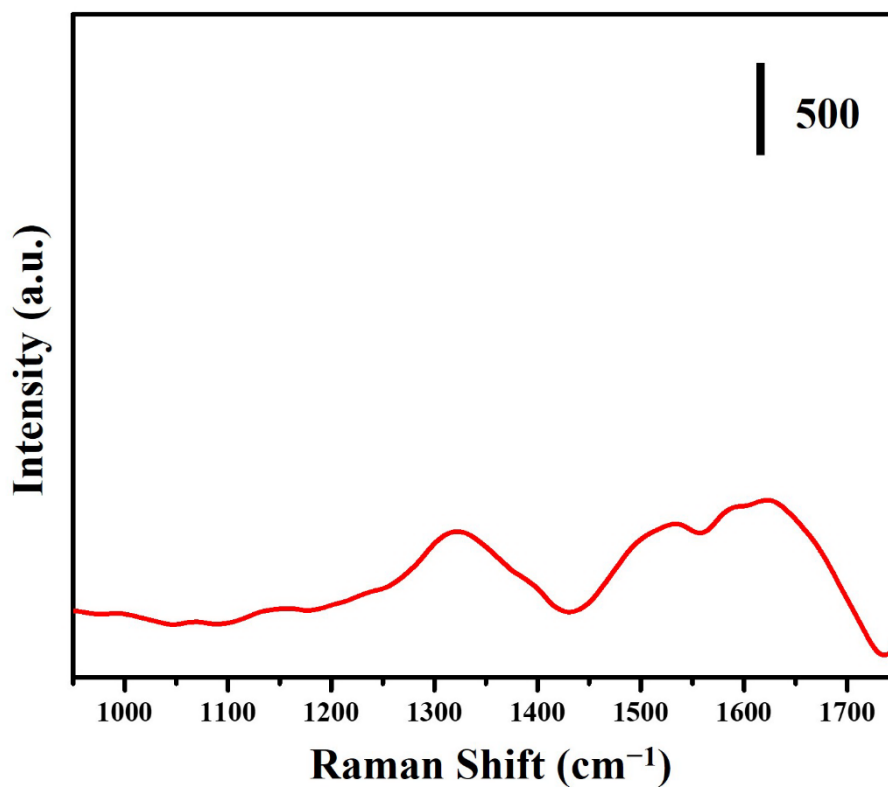

**Figure S4** SERS spectrum of R6G at  $10^{-13}$  M was obtained from CuO@RF@Ag nanowires.

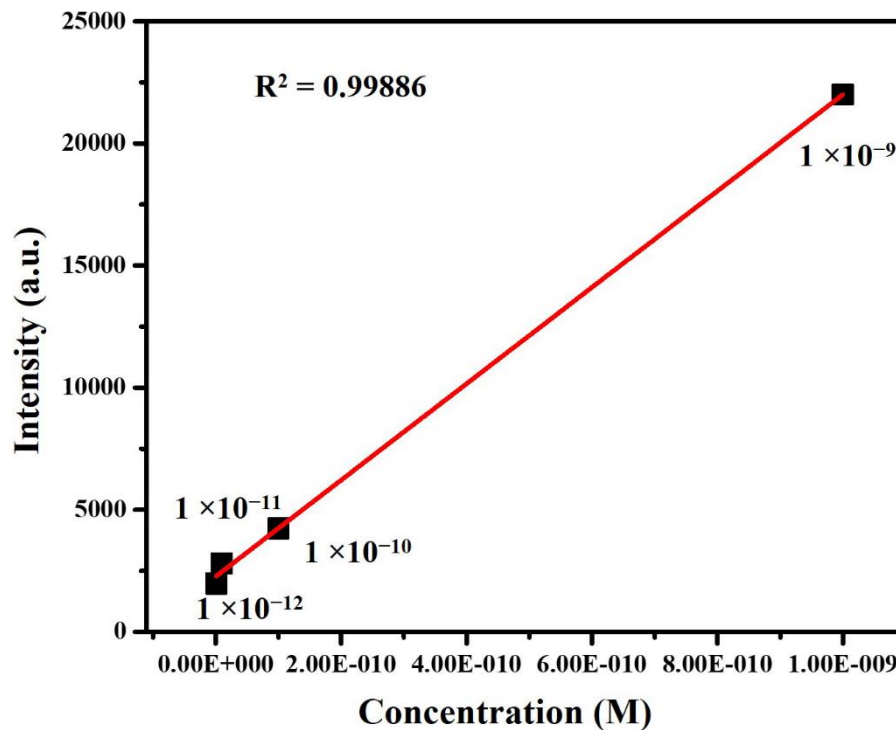

**Figure S5** The concentration dependence of R6G peak intensity at  $1649 \text{ cm}^{-1}$  as a function of R6G concentrations ranging from  $10^{-9}$  to  $10^{-12}$  M for CuO@RF@Ag nanowires.

**Table S1** Comparison of different methods for amoxicillin and 5-FU detection.

| Materials            | Drug           | Detection Limit (M)   | References |
|----------------------|----------------|-----------------------|------------|
| Ag nanoparticles     | Amoxicillin    | $4.4 \times 10^{-10}$ | Ref. 40    |
| Ag nanocube          | Amoxicillin    | $1 \times 10^{-9}$    | Ref. 41    |
| AuNPs/Si nano column | Amoxicillin    | $1 \times 10^{-9}$    | Ref. 42    |
| CuO@RF@Ag nanowires  | Amoxicillin    | $1 \times 10^{-10}$   | This work  |
| Ag nanoparticles     | 5-fluorouracil | $1 \times 10^{-5}$    | Ref. 43    |
| Ag colloid droplets  | 5-fluorouracil | $3.8 \times 10^{-7}$  | Ref. 44    |
| Ag NPs/Si pyramids   | 5-fluorouracil | $1 \times 10^{-6}$    | Ref. 45    |
| CuO@RF@Ag nanowires  | 5-fluorouracil | $1 \times 10^{-7}$    | This work  |
